# Supplementary material for: Fanconi syndrome with acute proximal tubular injury induced by a dietary supplement containing beni-koji: a case series report
Source: PubMed Central journal article supplement — BMC Nephrol. 2024 Dec 5;25:446. doi: 10.1186/s12882-024-03903-5 (PMC11622456; doi:10.1186/s12882-024-03903-5), 2024-12-05
Supplement: 12882_2024_3903_MOESM2_ESM.pdf [file 12882_2024_3903_MOESM2_ESM.pdf]

0 2 4 6 10 22 weeks

Discontinuation of supplement Discharge from hospital (day 14)

**Kidney biopsy  
acute proximal tubular injury**

1000 mL/day 500 mL/day

Peripheral parenteral nutrition

1500 mg/day

Monobasic sodium phosphate monohydrate

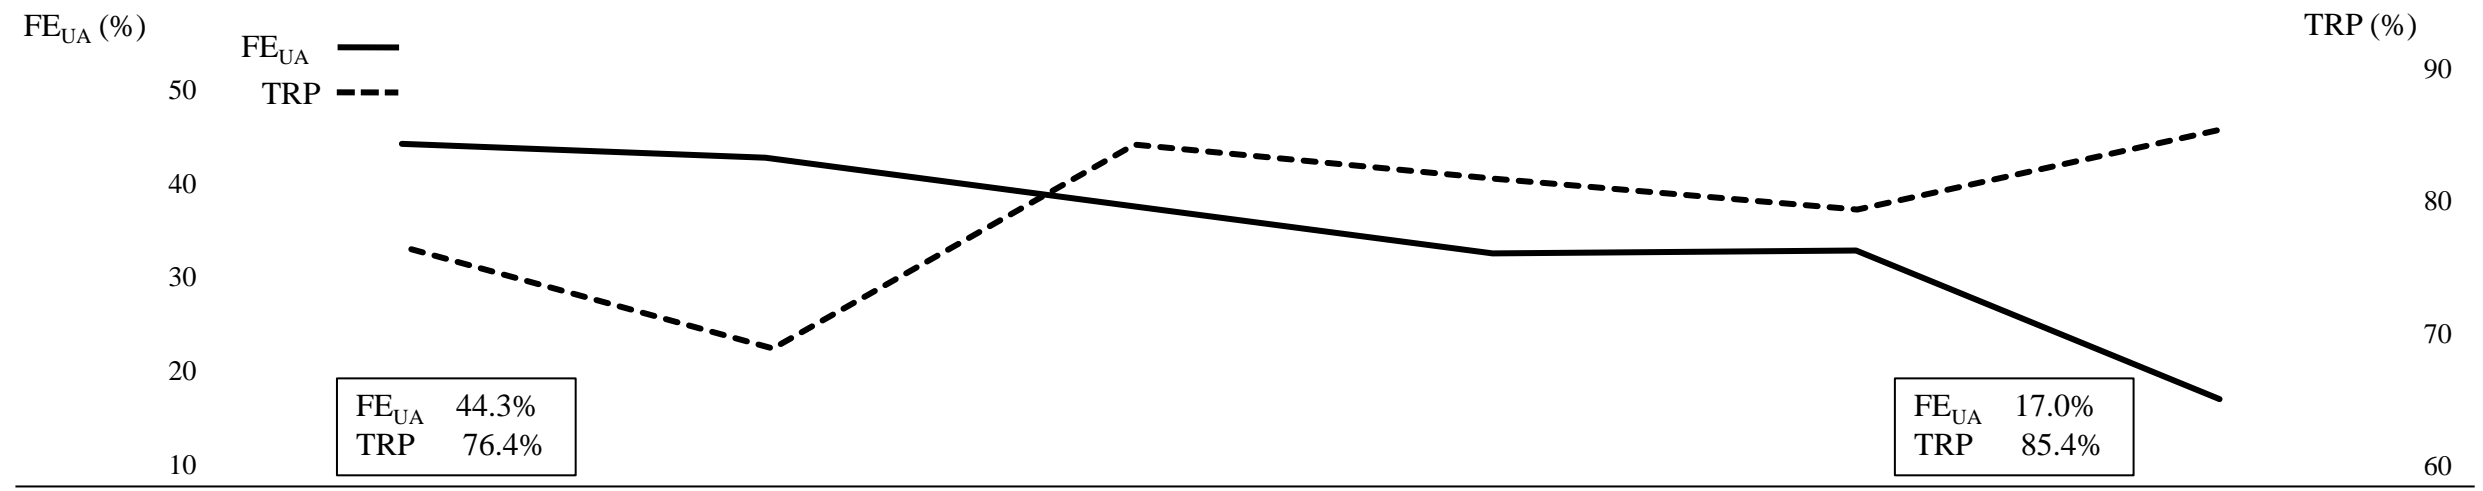

|                                   |        |        |        |       |       |      |
|-----------------------------------|--------|--------|--------|-------|-------|------|
| Creatinine (mg/dL)                | 1.30   | 0.84   | 0.83   | 0.81  | 0.82  | 0.74 |
| Bicarbonate (mEq/L)               | 16.7   | 25.6   | 25.8   | 25.6  | 23.7  | 26.8 |
| Potassium (mEq/L)                 | 2.2    | 3.1    | 3.3    | 3.3   | 3.8   | 3.6  |
| Phosphorus (mg/dL)                | 1.2    | 1.9    | 2.8    | 2.6   | 3.3   | 3.4  |
| Uric acid (mg/dL)                 | 1.4    | 1.1    | 1.2    | 1.7   | 1.9   | 2.0  |
| Urinary protein (g/gCr)           | 2.09   | 1.03   | 0.45   | 0.34  | 0.27  | -    |
| Urinary glucose                   | 4+     | 3+     | ±      | ±     | -     | -    |
| Urinary β <sub>2</sub> -MG (μg/L) | 50,870 | 66,370 | 10,195 | 2,408 | 2,884 | 402  |
