# Supplementary material for: Fanconi syndrome with acute proximal tubular injury induced by a dietary supplement containing beni-koji: a case series report
Source: PubMed Central journal article supplement — BMC Nephrol. 2024 Dec 5;25:446. doi: 10.1186/s12882-024-03903-5 (PMC11622456; doi:10.1186/s12882-024-03903-5), 2024-12-05
Supplement: 12882_2024_3903_MOESM3_ESM.pdf [file 12882_2024_3903_MOESM3_ESM.pdf]

0 2 4 8 14 26 weeks

Discontinuation of supplement →

Discharge from hospital (day 13)

**Kidney biopsy  
acute proximal tubular injury**

1200 mg/day 2400 mg/day 1200 mg/day  
Potassium chloride

Urine output (mL/day)

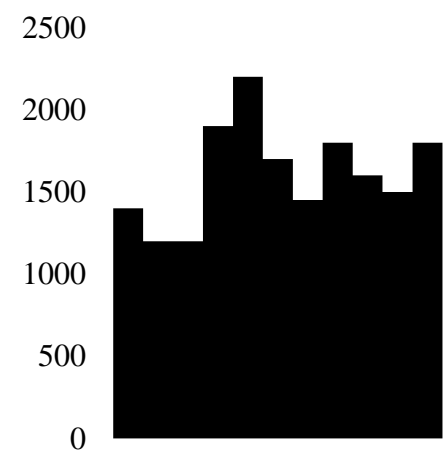

|                                    |        |        |        |        |        |       |
|------------------------------------|--------|--------|--------|--------|--------|-------|
| Creatinine (mg/dL)                 | 3.0    | 1.98   | 1.53   | 1.61   | 1.56   | 1.34  |
| Bicarbonate (mEq/L)                | 13.6   | 22.1   | 21.9   | 25.1   | 25.4   | NA    |
| Potassium (mEq/L)                  | 2.4    | 2.3    | 3.3    | 4.2    | 4.1    | 4.0   |
| Phosphorus (mg/dL)                 | 2.4    | 1.4    | 2.0    | 3.1    | 3.7    | 3.5   |
| Uric acid (mg/dL)                  | 2.4    | 1.9    | 2.1    | 2.5    | 3.3    | 3.7   |
| Urinary protein (g/gCr)            | 2.41   | 1.58   | 1.49   | 0.8    | 0.37   | 0.16  |
| Urinary glucose                    | 3+     | 2+     | 1+     | -      | -      | -     |
| Urinary $\beta_2$ -MG ( $\mu$ g/L) | 50,857 | 80,162 | 99,539 | 49,140 | 16,187 | 4,570 |
